# Supplementary material for: Participants in the Trans-Antarctic Winter Traverse Expedition Showed Increased Bacterial Load and Diversity in Saliva but Maintained Individual Differences within Stool Microbiota and Across Metabolite Fingerprints
Source: MDPI journal article supplement (doi:10.3390/ijms24054850), 2023-03-02
Supplement: s1 [file s1]

## **ELECTRONIC SUPPORTING INFORMATION**

### **Participants in the Trans-Antarctic Winter Traverse Expedition Showed Increased Bacterial Load and Diversity in Saliva but Maintained Individual Differences within Stool Microbiota and Across Metabolite Fingerprints**

Simon J. S. Cameron, Arwyn Edwards, Robert J. Lambert, Mike Stroud, Luis A. J. Mur.

#### **CONTENTS**

- S1** Table S1 - Taxonomic Identification of Significant Metataxonomic Features from Saliva Samples
- S2** Table S2 - Taxonomic Identification of Significant Metataxonomic Features from Stool Samples
- S3** Table S3 - Time Series Analysis of FIE-MS and FTIR Metabolite Fingerprinting
- S4** Figure S1 - Salivary and Plasma pH Across Activity and Participant Differences
- S5** Figure S2 - Water Content of Stool Shows Participant Not Activity Differences
- S6** Figure S3 - Positive Ion Detection Mode FIE-MS Metabolite Fingerprinting
- S7** Figure S4 - Metataxonomic Correlations within Salivary Samples
- S8** Figure S5 - Metataxonomic Correlations within Stool Samples
- S9** Figure S6 - Metataxonomic Correlations with Positive Ion FIE-MS in Salivary Samples
- S10** Figure S7 - Metataxonomic Correlations with Positive Ion FIE-MS in Stool Samples
- S11** Supporting Data Matrix 1 - Individual Participant Metadata Across TAWT Period
- S12** Supporting Data Matrix 2 - Tentative Database Matches for Metabolite Fingerprints
- S13** Supporting Data Files – FTIR and FIE-MS Metabolite Fingerprinting Data Sets

**Table S1. Taxonomic Identification of Significant Metataxonomic Features from Saliva Samples**

Taxonomic identifications to the lowest level possible based on QIIME processing and comparison to the Greengenes database for significant metataxonomic features from saliva identified through MicrobiomeAnalyst analysis for activity and participant differences.

| OTU Feature         | FDR Value | Lowest Taxon ID |                                  |
|---------------------|-----------|-----------------|----------------------------------|
| Saliva Activity     |           |                 |                                  |
| OTU028              | 5.06E-06  | Genus           | <i>Streptococcus</i>             |
| OTU012              | 0.00788   | Species         | <i>Prevotella melaninogenica</i> |
| Saliva Participants |           |                 |                                  |
| OTU006              | 5.96E-08  | Genus           | <i>Porphyromonas</i>             |
| OTU021              | 5.96E-08  | Family          | Gemellaceae                      |
| OTU030              | 5.96E-08  | Order           | Clostridiales                    |
| OTU065              | 7.93E-08  | Phylum          | SR1                              |
| OTU050              | 5.26E-07  | Genus           | <i>Parvimonas</i>                |
| OTU053              | 5.26E-07  | Genus           | <i>Fusobacterium</i>             |
| OTU013              | 1.76E-06  | Species         | <i>Prevotella nanceiensis</i>    |
| OTU016              | 4.55E-06  | Genus           | <i>Capnocytophaga</i>            |
| OTU032              | 6.25E-06  | Family          | Lachnospiraceae                  |
| OTU055              | 7.20E-05  | Genus           | <i>Leptotrichia</i>              |
| OTU014              | 0.000406  | Genus           | <i>Prevotella</i>                |
| OTU036              | 0.000631  | Genus           | <i>Oribacterium</i>              |
| OTU009              | 0.000783  | Genus           | <i>Prevotella</i>                |
| OTU010              | 0.001551  | Genus           | <i>Prevotella</i>                |
| OTU045              | 0.00235   | Genus           | <i>Veillonella</i>               |
| OTU067              | 0.002867  | Class           | TM7-3                            |
| OTU047              | 0.002916  | Species         | <i>Veillonella dispar</i>        |
| OTU020              | 0.007273  | Family          | Gemellaceae                      |
| OTU041              | 0.007273  | Family          | Veillonellaceae                  |
| OTU058              | 0.007446  | Genus           | <i>Neisseria</i>                 |
| OTU031              | 0.007635  | Order           | Clostridiales                    |
| OTU012              | 0.011791  | Species         | <i>Prevotella melaninogenica</i> |
| OTU022              | 0.012925  | Order           | Lactobacillales                  |
| OTU001              | 0.012925  | Genus           | <i>Actinomyces</i>               |
| OTU004              | 0.015672  | Genus           | <i>Atopobium</i>                 |
| OTU038              | 0.020695  | Genus           | <i>Peptococcus</i>               |
| OTU061              | 0.028259  | Genus           | <i>Haemophilus</i>               |
| OTU048              | 0.031987  | Family          | Mogibacteriaceae                 |
| OTU052              | 0.032108  | Species         | <i>Bulleidia moorei</i>          |
| OTU028              | 0.036996  | Genus           | <i>Streptococcus</i>             |
| OTU039              | 0.037449  | Family          | Peptostreptococcaceae            |
| OTU034              | 0.049772  | Genus           | <i>Catonella</i>                 |

**Table S2. Taxonomic Identification of Significant Metataxonomic Features from Stool Samples**

Taxonomic identifications to the lowest level possible based on QIIME processing and comparison to the Greengenes database for significant metataxonomic features from saliva identified through MicrobiomeAnalyst analysis for activity and participant differences.

| OTU Feature       | FDR Value | Lowest Taxon ID |                                     |
|-------------------|-----------|-----------------|-------------------------------------|
| Stool Activity    |           |                 |                                     |
| OTU055            | 3.59E-05  | Family          | Ruminococcaceae                     |
| Stool Participant |           |                 |                                     |
| OTU061            | 3.04E-18  | Genus           | <i>Dialister</i>                    |
| OTU056            | 1.62E-12  | Family          | Ruminococcaceae                     |
| OTU043            | 3.32E-08  | Species         | <i>Blautia producta</i>             |
| OTU042            | 4.10E-08  | Genus           | <i>Blautia</i>                      |
| OTU039            | 7.77E-08  | Family          | Lachnospiraceae                     |
| OTU059            | 1.52E-07  | Genus           | <i>Ruminococcus</i>                 |
| OTU010            | 5.53E-07  | Genus           | <i>Bacteroides</i>                  |
| OTU011            | 2.31E-06  | Genus           | <i>Bacteroides</i>                  |
| OTU068            | 4.43E-06  | Family          | Erysipelotrichaceae                 |
| OTU016            | 5.56E-05  | Genus           | <i>Parabacteroides</i>              |
| OTU049            | 9.50E-05  | Genus           | <i>Lachnospira</i>                  |
| OTU037            | 0.000245  | Genus           | SMB53                               |
| OTU057            | 0.00043   | Species         | <i>Faecalibacterium prausnitzii</i> |
| OTU014            | 0.000449  | Species         | <i>Bacteroides ovatus</i>           |
| OTU078            | 0.000449  | Family          | Anaeroplasmataceae                  |
| OTU074            | 0.000757  | Genus           | <i>Sutterella</i>                   |
| OTU060            | 0.001129  | Genus           | <i>Ruminococcus</i>                 |
| OTU013            | 0.001143  | Species         | <i>Bacteroides fragilis</i>         |
| OTU020            | 0.006354  | Species         | <i>Prevotella copri</i>             |
| OTU015            | 0.008499  | Species         | <i>Bacteroides uniformis</i>        |
| OTU050            | 0.008499  | Genus           | <i>Roseburia</i>                    |
| OTU044            | 0.009105  | Genus           | <b><i>Coprococcus</i></b>           |
| OTU031            | 0.01001   | Order           | Clostridiales                       |
| OTU032            | 0.010225  | Order           | Clostridiales                       |
| OTU003            | 0.019339  | Species         | <i>Bifidobacterium adolescentis</i> |
| OTU041            | 0.019661  | Genus           | <i>Blautia</i>                      |
| OTU035            | 0.019661  | Family          | Clostridiaceae                      |
| OTU045            | 0.022088  | Genus           | <i>Coprococcus</i>                  |
| OTU025            | 0.030041  | Genus           | <i>Odoribacter</i>                  |
| OTU040            | 0.030041  | Genus           | <i>Anaerostipes</i>                 |
| OTU051            | 0.032061  | Genus           | <i>Ruminococcus</i>                 |
| OTU038            | 0.036159  | Family          | Lachnospiraceae                     |
| OTU070            | 0.045024  | Species         | <i>Eubacterium biforme</i>          |

**Table S3. Time Series Analysis of FIE-MS and FTIR Metabolite Fingerprinting**

Time series analysis using MetaboAnalyst two-way ANOVA pipeline for three metabolite fingerprinting modalities across all three biofluid sample types. *P* values given for time, participant, and interaction effects.

| Analysis Method | Biofluid | Time <i>P</i> Value | Participant <i>P</i> Value | Interaction <i>P</i> Value |
|-----------------|----------|---------------------|----------------------------|----------------------------|
| FIEMS Negative  | Saliva   | 0.75                | 0.25                       | 0.80                       |
|                 | Plasma   | 1.00                | 0.15                       | 0.75                       |
|                 | Stool    | 1.00                | < 0.05                     | 0.65                       |
| FIEMS Positive  | Saliva   | 0.35                | 0.10                       | 0.45                       |
|                 | Plasma   | 0.80                | 0.25                       | 0.20                       |
|                 | Stool    | 1.00                | < 0.05                     | 0.70                       |
| FTIR            | Saliva   | 0.80                | 0.25                       | 0.55                       |
|                 | Plasma   | 0.60                | 0.95                       | < 0.001                    |
|                 | Stool    | 0.85                | < 0.001                    | 0.25                       |

**Figure S1. Salivary and Plasma pH Across Activity and Participant Differences**

Salivary and plasma pH differences across activity periods and individual participants. pH readings taken to one decimal place on raw, untreated samples. Statistical significance determined by FDR corrected one-way ANOVA and indicated by \* =  $P < 0.05$ ; \*\* =  $P < 0.01$ ; and \*\*\* =  $P < 0.001$ .

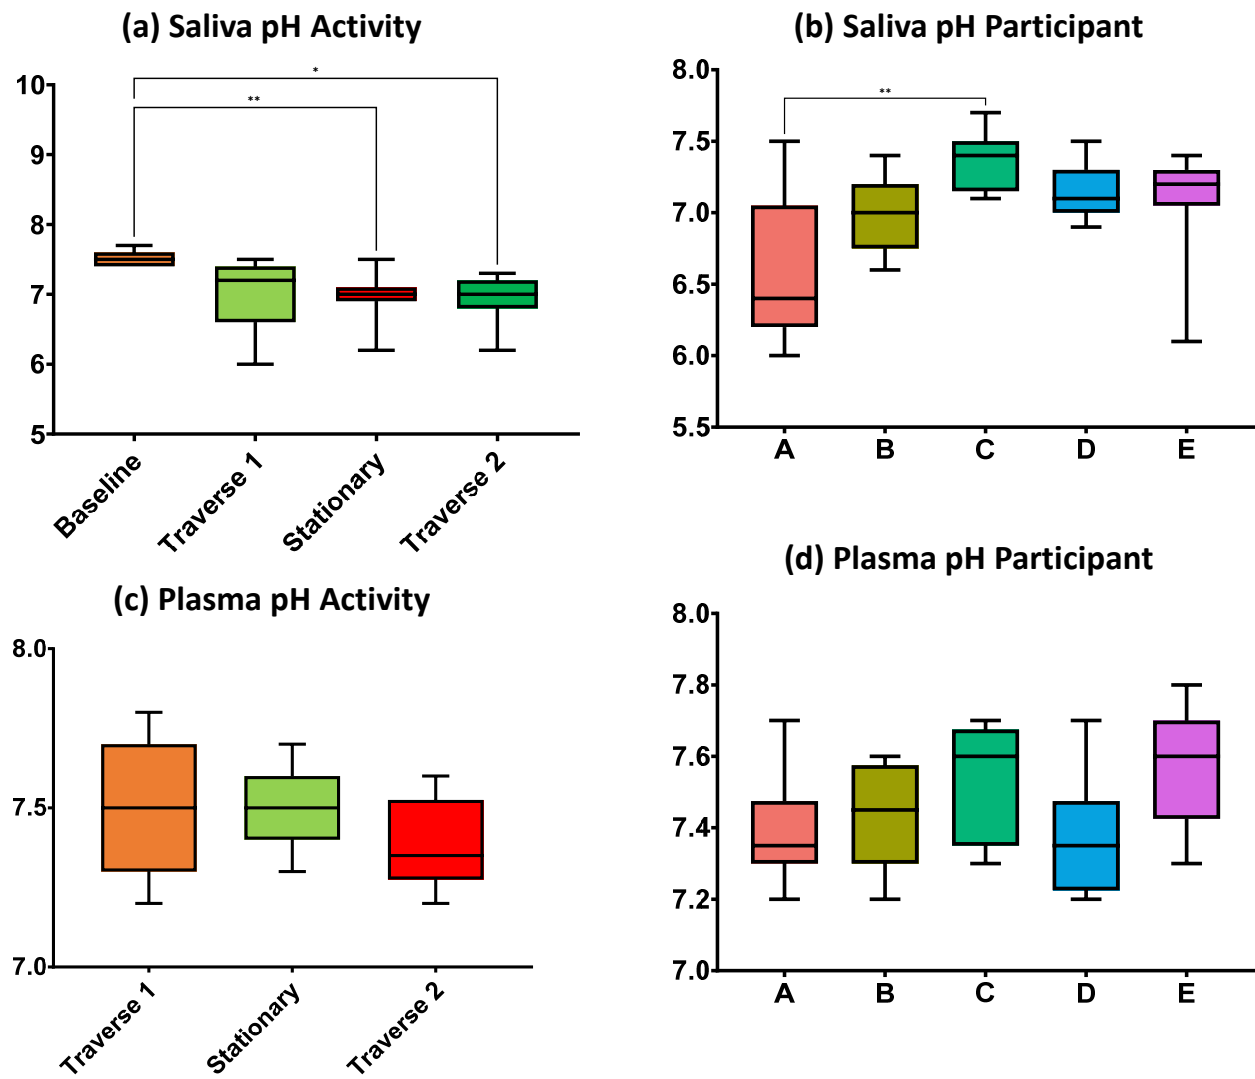

**Figure S2. Water Content of Stool Shows Participant Not Activity Differences**

Water content of stool samples as determined by weight loss after freeze drying process across activity periods and individual participants. Statistical significance determined by FDR corrected one-way ANOVA and indicated by \* =  $P < 0.05$ ; \*\* =  $P < 0.01$ ; and \*\*\* =  $P < 0.001$ .

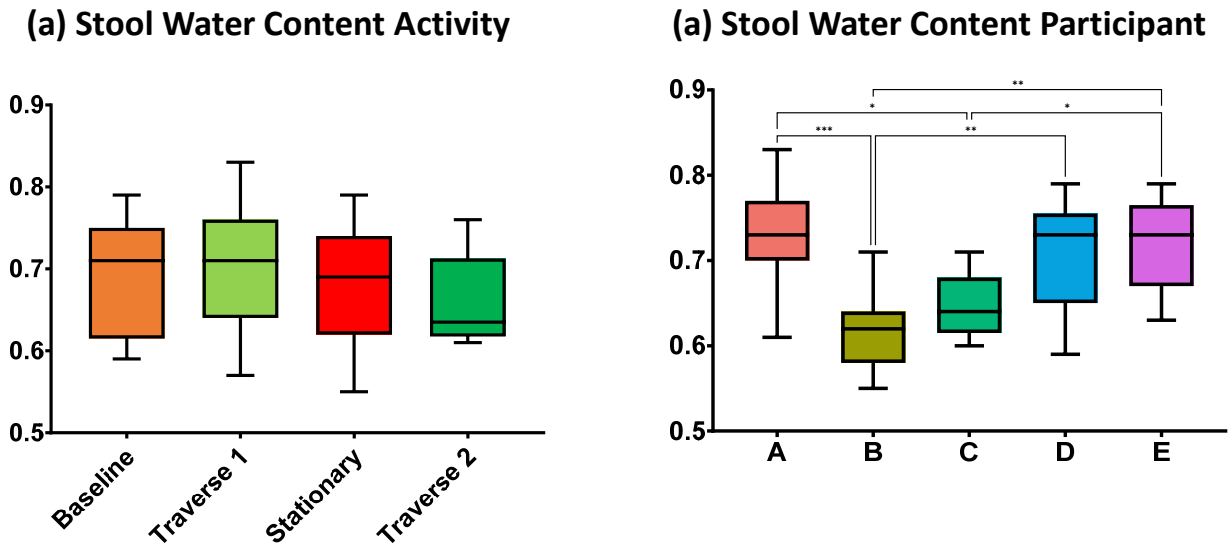

**Figure S3. Positive Ion Detection Mode FIE-MS Metabolite Fingerprinting**

(a-f) PCA plots of first two components across sample types and activity/participant differences; and (g) shows significantly different (FDR corrected  $P < 0.05$ ) metabolite fingerprint features in stool for activity/participant differences as indicated by colour shading and plotted from 50 to 1200  $m/z$  range. No significantly different features were detected in saliva nor plasma samples.

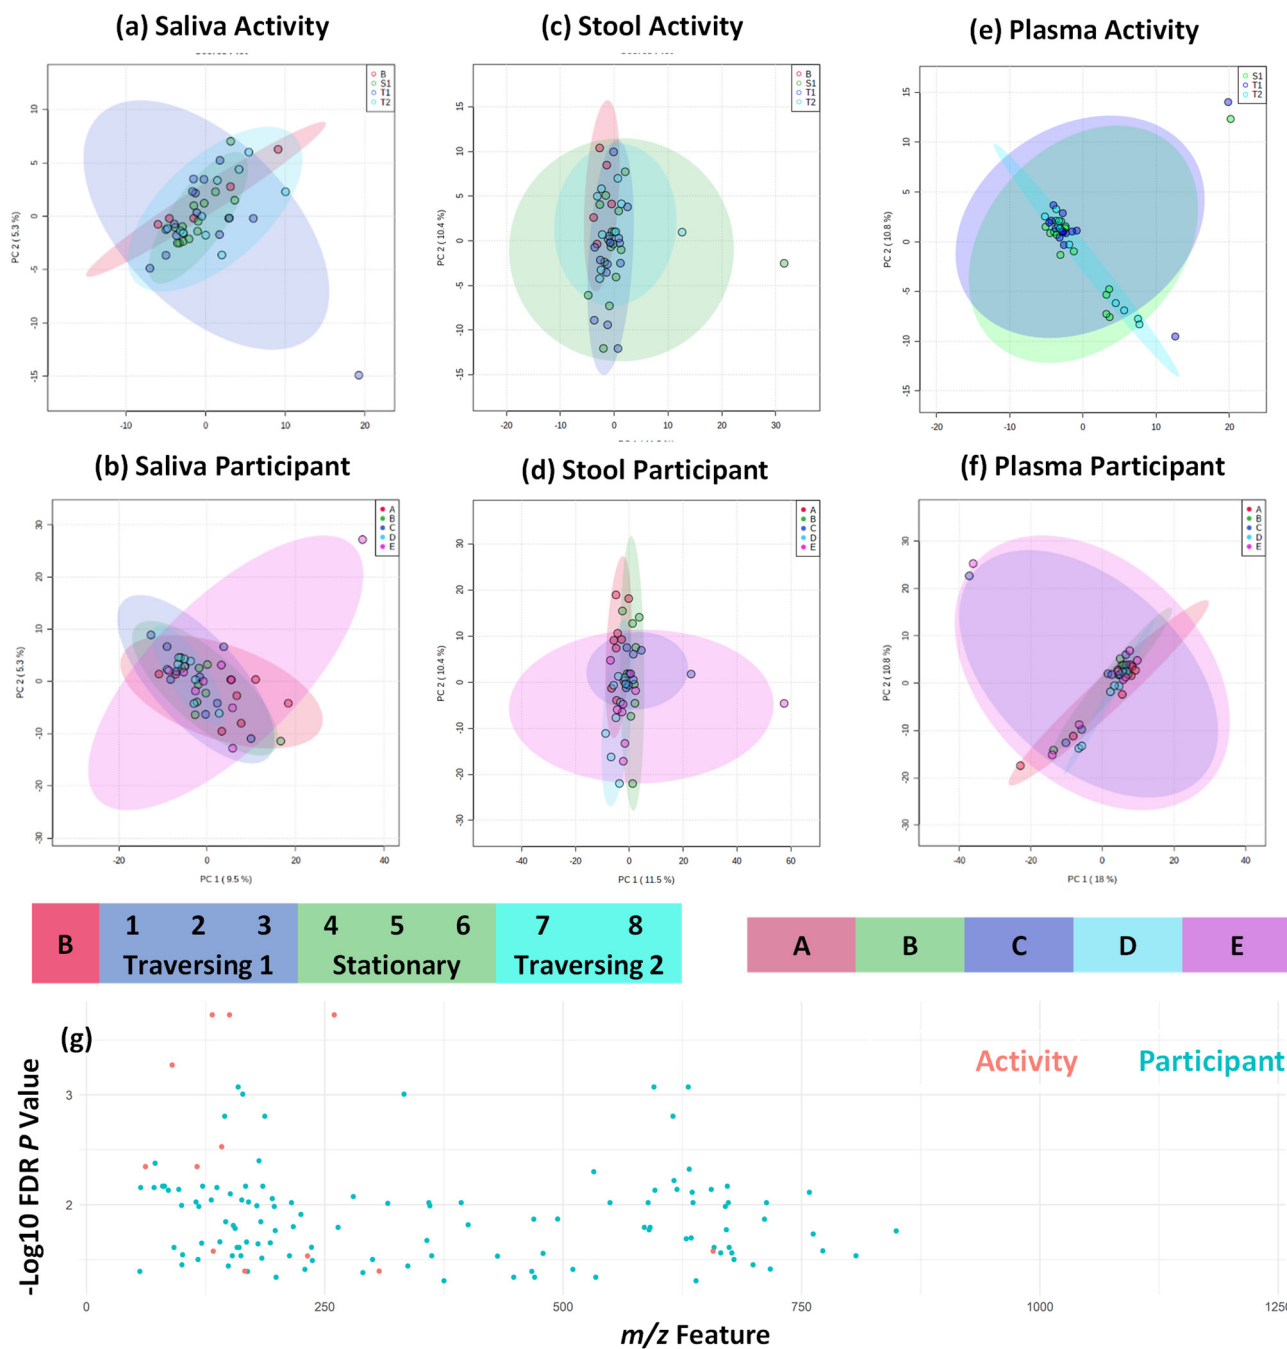

**Figure S4. Metataxonomic Correlations within Salivary Samples**

OTU level correlations within saliva samples shown to the lowest level of taxonomic classification. Only those taxons with at least one significant correlation ( $P < 0.05$ ) other than with itself after Bonferroni multiple testing correction are displayed. Within these taxons, non-significant correlations ( $P > 0.05$ ) are not shown. The size and colour of circles indicates type (blue = positive and red = negative) and strength of correlation as indicated by heat legend.

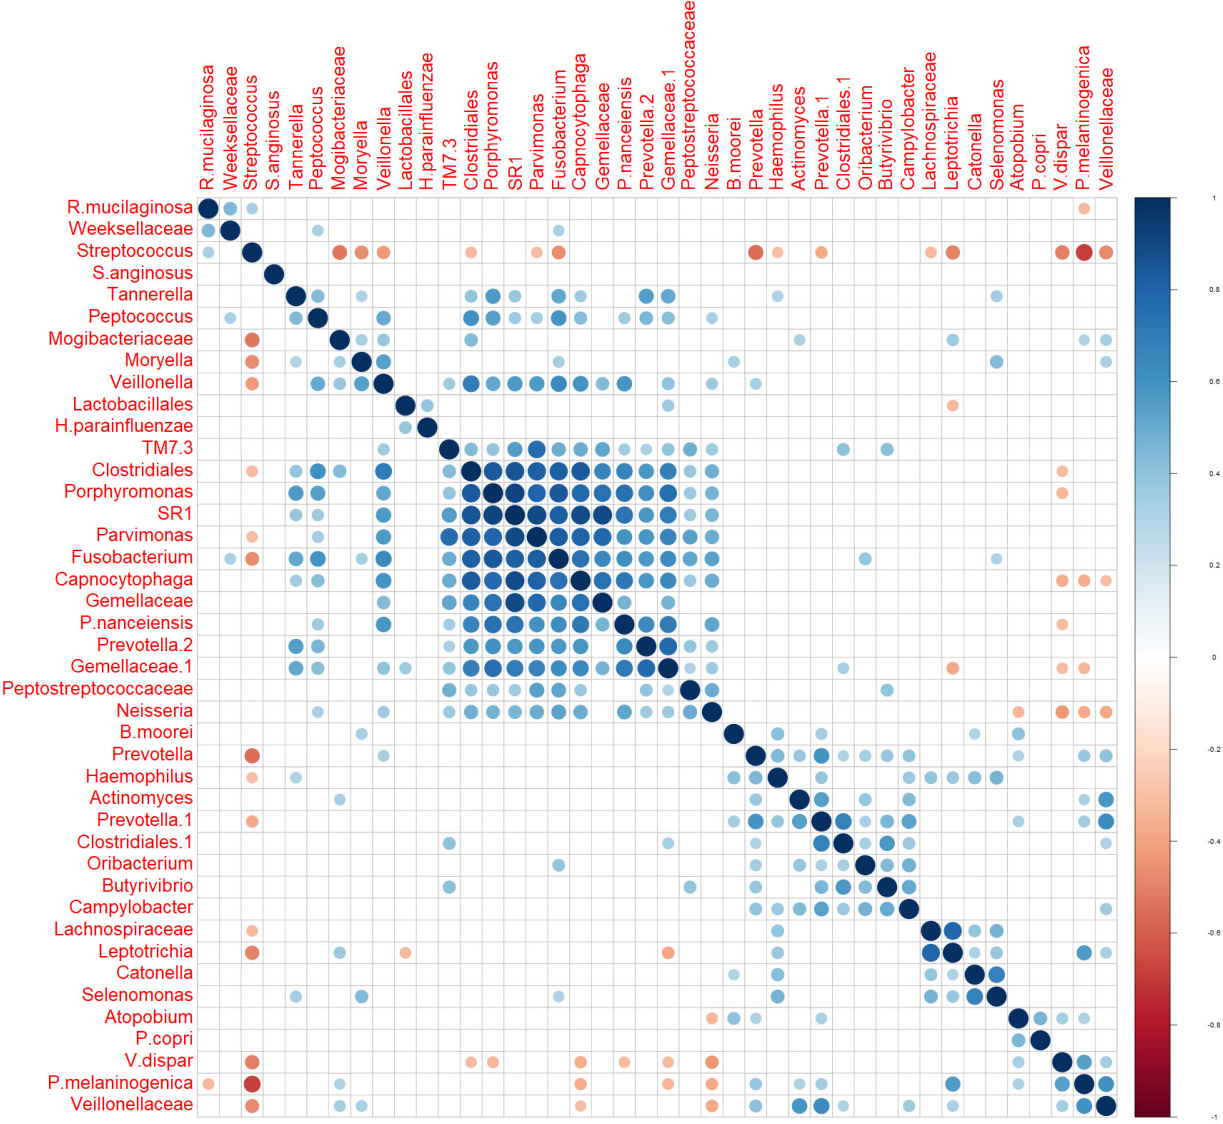



**Figure S5. Metataxonomic Correlations within Stool Samples**

OTU level correlations within stool samples shown to the lowest level of taxonomic classification. Only those taxa with at least one significant correlation ( $P < 0.05$ ) other than with itself after Bonferroni multiple testing correction are displayed. Within these taxa, non-significant correlations ( $P > 0.05$ ) are not shown. The size and colour of circles indicates type (blue = positive and red = negative) and strength of correlation as indicated by heat legend.

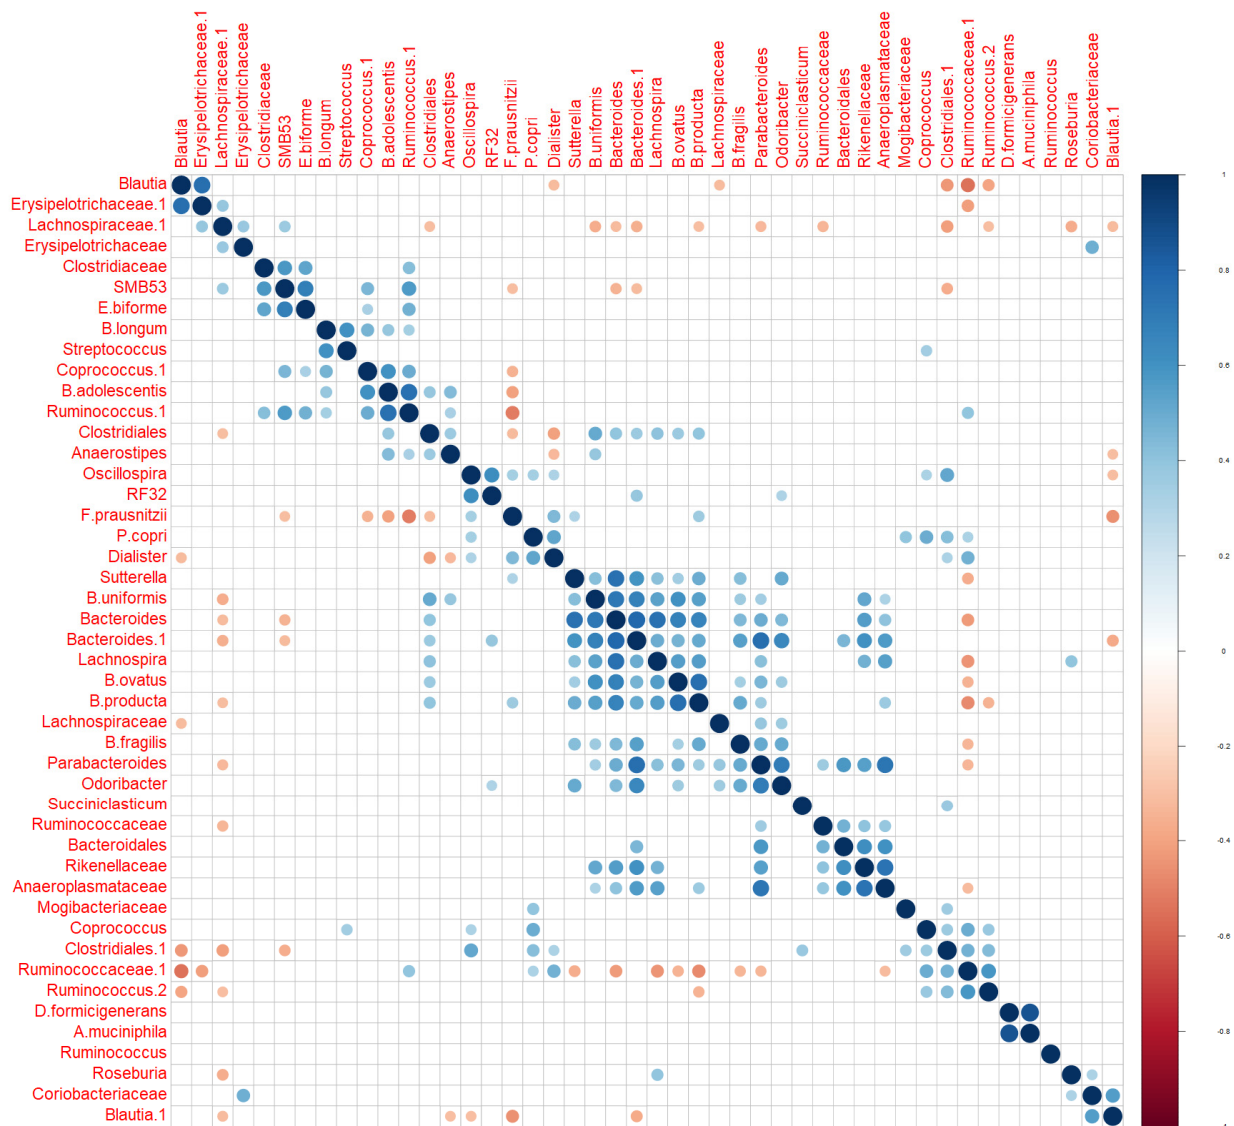

**Figure S6. Metataxonomic Correlations with Positive Ion FIE-MS in Salivary Samples**

Significant correlations between metataxonomic and positive ion FIE-MS metabolite fingerprint features in salivary samples. Only taxons with at least one significant correlation are shown. Correlations are plotted with size of point indicative of strength of correlation and colour of point indicative of Bonferroni corrected *P* value as shown by accompanying legend.

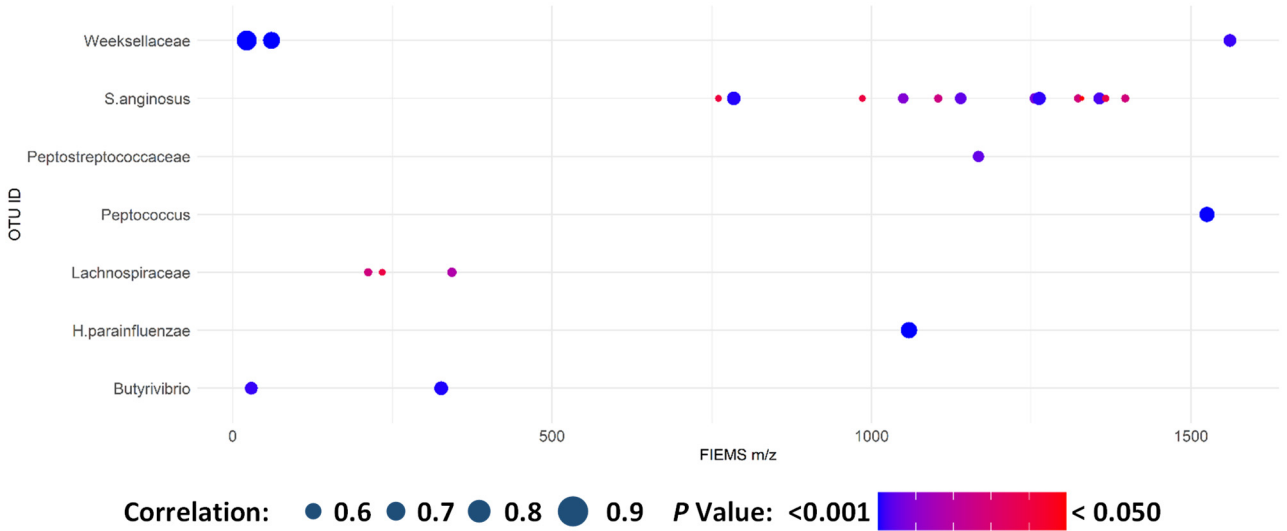

**Figure S7. Metataxonomic Correlations with Positive Ion FIE-MS in Stool Samples**

Significant correlations between metataxonomic and positive ion FIE-MS metabolite fingerprint features in stool samples. Only taxons with at least one significant correlation are shown. Correlations are plotted with size of point indicative of strength of correlation and colour of point indicative of Bonferroni corrected *P* value as shown by accompanying legend.

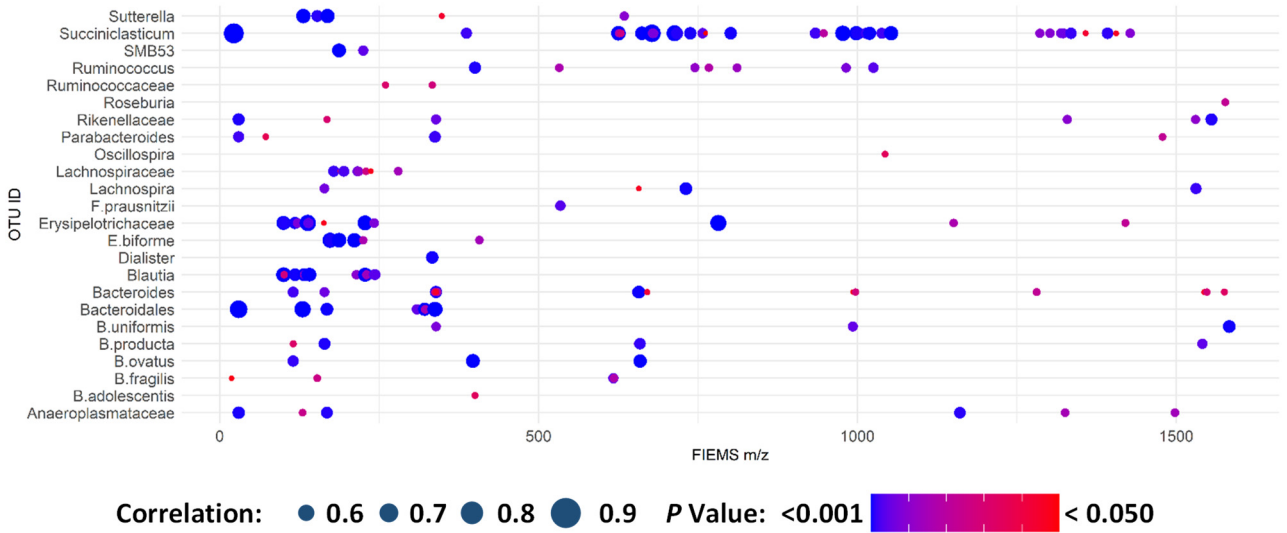

### **Supporting Data Matrix 1 – Individual Participant Metadata Across TAWT Period**

This supplementary data matrix is provided as an additional Microsoft Excel (.xlsx) file. Each tab of the spreadsheet gives information on each participant (A, B, C, D, and E) across a range of physiological parameters for each month of the TAWT period. Measurements were taken by the expedition medic using established methodologies. Provided in ZIP archive file with Supporting Data Matrix 2 and Supporting Data Files.

## Supporting Data Matrix 2 – Tentative Database Matches for Metabolite Fingerprints

This supplementary data matrix is provided as an additional Microsoft Excel (.xlsx) file. Each tab of the spreadsheet gives information on the tentative database matches for metabolite fingerprint features for either negative ion or positive ion detection mode FIE-MS analysis. Only those features which have a significant result with either activity or individual participant differences or significant correlation with a metataxonomic feature are shown. Tentative database matches are given against the Human Metabolome Database with the following details recorded and as detailed in the Materials and Method section of the main manuscript. Provided in ZIP archive file with Supporting Data Matrix 1 and Supporting Data Files.

| Data Column       | Description                                                                 |
|-------------------|-----------------------------------------------------------------------------|
| <i>m/z</i>        | Mass-to-charge ratio of metabolite fingerprint feature                      |
| Biofluid          | Biofluid (plasma, saliva, stool) feature identified in                      |
| Source            | Analysis source for identification of significant difference or correlation |
| Count             | Number of tentative database matches with the same ppm values               |
| Name              | Standardised chemical name of tentative database match                      |
| Formula           | Elemental formula of tentative database match                               |
| Monoisotopic Mass | Monoisotopic mass of tentative database match                               |
| Adduct            | Adduct type of ion of tentative database match                              |
| Matched Adduct    | Monoisotopic mass of adduct of tentative database match                     |
| ppm               | Mass accuracy of matched adduct against experimental <i>m/z</i>             |
| Database          | The unique HMDB identifier of tentative database match                      |
| Kingdom           | Chemical taxonomy as given in HMDB database entry                           |
| Super Class       | Chemical taxonomy as given in HMDB database entry                           |
| Class             | Chemical taxonomy as given in HMDB database entry                           |
| Sub Class         | Chemical taxonomy as given in HMDB database entry                           |
| Direct Parent     | Chemical taxonomy as given in HMDB database entry                           |

Features where no identification with ppm < 10 was achieved against the Human Metabolome Database are shaded in grey.

## Supporting Data Files – FTIR and FIE-MS Metabolite Fingerprinting Data Sets

The following data files are provided for FTIR and FIE-MS metabolite fingerprinting data sets as processed spectra after total count normalisation in comma separated value (.csv) files in a combined ZIP archive file with Supporting Data Matrices 1 and 2:

| File Name           | Description                                                 |
|---------------------|-------------------------------------------------------------|
| fiems_pl_neg_pa.csv | Negative Ion FIE-MS plasma data set labelled by participant |
| fiems_pl_neg_tr.csv | Negative Ion FIE-MS plasma data set labelled by activity    |
| fiems_pl_pos_pa.csv | Positive Ion FIE-MS plasma data set labelled by participant |
| fiems_pl_pos_tr.csv | Positive Ion FIE-MS plasma data set labelled by activity    |
| fiems_rs_neg_pa.csv | Negative Ion FIE-MS saliva data set labelled by participant |
| fiems_rs_neg_tr.csv | Negative Ion FIE-MS saliva data set labelled by activity    |
| fiems_rs_pos_pa.csv | Positive Ion FIE-MS saliva data set labelled by participant |
| fiems_rs_pos_tr.csv | Positive Ion FIE-MS saliva data set labelled by activity    |
| fiems_st_neg_pa.csv | Negative Ion FIE-MS stool data set labelled by participant  |
| fiems_st_neg_tr.csv | Negative Ion FIE-MS stool data set labelled by activity     |
| fiems_st_pos_pa.csv | Positive Ion FIE-MS stool data set labelled by participant  |
| fiems_st_pos_tr.csv | Positive Ion FIE-MS stool data set labelled by activity     |
| ftir_pl_pa.csv      | FTIR plasma data set labelled by participant                |
| ftir_pl_tr.csv      | FTIR plasma data set labelled by activity                   |
| ftir_rs_pa.csv      | FTIR saliva data set labelled by participant                |
| ftir_rs_tr.csv      | FTIR saliva data set labelled by activity                   |
| ftir_st_pa.csv      | FTIR stool data set labelled by participant                 |
| ftir_st_tr.csv      | FTIR stool data set labelled by activity                    |
